# Supplementary material
Source: PubMed Central journal article supplement (PMC10442696)
Supplement: NIHMS1901964-supplement-Table_S1.pdf [file NIHMS1901964-supplement-Table_S1.pdf]

Supplement Table 1. Number of patients included in each study for each antidepressant

| PMID                      | Sertraline | Fluoxetine | Paroxetine | Citalopram | Escitalopram | Fluvoxamine | Venlafaxine | Duloxetine | Trazodone | Clomipramine | Amitriptyline | Nortriptyline | Imipramine | Mirtazapine | Bupropion |
|---------------------------|------------|------------|------------|------------|--------------|-------------|-------------|------------|-----------|--------------|---------------|---------------|------------|-------------|-----------|
| 1749054                   |            |            |            |            |              |             |             |            |           | 1            |               |               |            |             |           |
| 8379562                   |            |            |            |            |              |             |             |            |           | 1            |               | 6             | 1          |             |           |
| 8834425                   |            |            |            |            |              |             |             |            |           |              |               | 1             | 1          |             |           |
| 11082480                  | 1          |            |            |            |              | 1           | 1           |            |           |              |               |               |            |             |           |
| 12189365                  |            |            |            | 11         |              |             |             |            |           |              |               |               |            |             |           |
| 12709723                  |            | 11         |            |            |              |             |             |            |           |              |               |               |            |             |           |
| 12727706                  | 11         | 15         | 8          | 4          |              |             |             |            |           |              |               |               |            |             |           |
| 12860776                  |            | 10         |            | 10         |              |             |             |            |           |              |               |               |            |             |           |
| 15003078                  |            |            | 33         |            |              |             |             |            |           |              |               |               |            |             |           |
| 15035694                  | 4          | 4          | 2          |            |              |             | 1           |            |           |              |               |               |            |             |           |
| 16271264                  |            |            |            |            |              |             |             |            |           | 7            |               | 10            |            |             |           |
| 16390902                  | 5          | 12         | 2          | 1          | 1            |             | 3           |            |           |              |               |               |            |             |           |
| 16433870                  |            | 9          |            |            |              |             |             |            |           |              |               |               |            |             |           |
| 18004149                  |            |            |            |            |              |             | 1           |            | 1         |              |               |               |            |             |           |
| 18426260                  | 6          |            |            | 3          | 2            |             |             |            |           |              |               |               |            |             |           |
| 19011433                  | 6          |            |            |            |              |             |             |            |           |              |               |               |            |             |           |
| 19452377                  | 6          | 2          | 1          | 9          | 8            | 1           | 11          |            |           |              |               |               |            |             |           |
| 19743889                  |            |            | 74         |            |              |             |             |            |           |              |               |               |            |             |           |
| 19809008                  |            |            |            |            |              |             |             | 1          |           |              |               |               |            |             |           |
| 20060670                  | 1          | 1          |            | 4          |              |             | 3           |            |           |              |               |               |            |             |           |
| 20631556                  |            | 17         |            |            |              |             |             |            |           |              |               |               |            |             |           |
| 21359876                  |            |            |            |            |              |             |             | 1          |           |              |               |               |            |             |           |
| 21824458                  | 9          | 5          |            | 1          | 2            | 1           | 2           |            |           |              |               | 1             |            |             |           |
| 24668283                  |            |            |            |            |              |             |             |            |           |              |               | 1             |            |             |           |
| 24989434                  |            |            |            |            |              |             | 7           |            |           |              |               |               |            |             |           |
| 26416100                  |            |            |            |            |              |             |             |            |           | 12           |               |               |            |             |           |
| 27180885                  |            |            |            |            |              |             |             |            |           |              |               |               |            |             | 22        |
| 27528039                  |            |            |            |            |              |             |             |            |           |              |               |               |            |             | 28        |
| 28129551                  | 6          |            |            |            |              |             |             |            |           |              |               |               |            |             |           |
| 28663113                  |            |            |            | 12         |              |             |             |            |           |              |               |               |            |             |           |
| 28708853                  | 34         | 41         | 19         | 58         | 95           | 3           | 33          |            |           |              |               |               |            |             |           |
| 30346625                  |            | 9          |            |            |              |             |             |            |           |              |               |               |            |             |           |
| 32056930                  |            |            |            |            |              |             | 9           |            |           |              |               |               |            |             |           |
| 33253437                  | 24         | 4          | 11         | 2          | 7            |             | 7           |            |           |              |               |               |            |             |           |
| 33751155                  | 9          |            |            |            |              |             |             |            |           |              |               |               |            |             |           |
| 33814540                  |            |            |            |            |              |             |             |            |           |              |               |               |            |             | 8         |
| 34348038                  |            |            |            |            |              |             |             |            | 1         |              |               |               |            |             |           |
| 34483982                  | 2          | 3          | 2          | 5          |              |             | 11          |            |           |              |               |               |            |             |           |
| 36094046                  | 47         |            |            |            |              |             |             |            |           |              |               |               |            |             |           |
| 36103361                  | 11         |            |            | 4          | 8            |             | 8           | 1          |           | 4            | 16            |               |            | 11          |           |
| <b>Total Subjects</b>     | <b>182</b> | <b>143</b> | <b>152</b> | <b>124</b> | <b>123</b>   | <b>6</b>    | <b>97</b>   | <b>3</b>   | <b>2</b>  | <b>25</b>    | <b>16</b>     | <b>19</b>     | <b>2</b>   | <b>11</b>   | <b>58</b> |
| <b>Total Publications</b> | <b>16</b>  | <b>14</b>  | <b>9</b>   | <b>13</b>  | <b>7</b>     | <b>4</b>    | <b>13</b>   | <b>3</b>   | <b>2</b>  | <b>5</b>     | <b>1</b>      | <b>5</b>      | <b>2</b>   | <b>1</b>    | <b>3</b>  |
