# Supplementary material
Source: PubMed Central journal article supplement (PMC10442696)
Supplement: NIHMS1901964-supplement-Table_S2.pdf [file NIHMS1901964-supplement-Table_S2.pdf]

Supplement Table 2. Basic information, study design and available data in each study

| PMID     | First Author      | Publication Year | Study Design                            | Drug                                                                                   | Number of Patients | Nonpregnant Control Group | Maternal Plasma Concentration | Cord Blood or Infant Plasma Concentration | Reported PK parameters | Amniotic Fluid Concentration | Dose Normalized | Reported Time after Dose        | Metabolite Concentration | Genotype Information |
|----------|-------------------|------------------|-----------------------------------------|----------------------------------------------------------------------------------------|--------------------|---------------------------|-------------------------------|-------------------------------------------|------------------------|------------------------------|-----------------|---------------------------------|--------------------------|----------------------|
| 1749054  | Schimmell, M. S.  | 1991             | At delivery and postpartum              | clomipramine                                                                           | 1                  | n                         | y                             | y                                         | n                      | n                            | y               | Range                           | n                        | n                    |
| 8379562  | Wisner, K. L.     | 1993             | Longitudinal                            | clomipramine, nortriptyline, imipramine                                                | 8                  | 6w postpartum             | y                             | n                                         | n                      | n                            | y               | Range                           | n                        | n                    |
| 8834425  | Altschuler, L. L. | 1996             | Longitudinal                            | nortriptyline, imipramine                                                              | 2                  | n                         | y                             | n                                         | n                      | n                            | y               | n                               | n                        | n                    |
| 11082480 | Hostetter, A.     | 2000             | Longitudinal                            | sertraline, fluvoxamine, venlafaxine                                                   | 3                  | n                         | y                             | y                                         | n                      | y                            | y               | y                               | y                        | n                    |
| 12189365 | Heikkinen, T.     | 2002             | Longitudinal                            | citalopram                                                                             | 11                 | y                         | y                             | y                                         | n                      | n                            | y               | n                               | y                        | n                    |
| 12709723 | Heikkinen, T.     | 2003             | Longitudinal                            | fluoxetine                                                                             | 11                 | y                         | y                             | y                                         | n                      | n                            | y               | n                               | y                        | n                    |
| 12727706 | Hendrick, V.      | 2003             | At delivery only                        | sertraline, fluoxetine, paroxetine, citalopram                                         | 38                 | n                         | y                             | y                                         | n                      | n                            | y               | y                               | y                        | n                    |
| 12860776 | Laine, K.         | 2003             | Longitudinal                            | fluoxetine, citalopram                                                                 | 20                 | n                         | y                             | y                                         | n                      | n                            | n               | n                               | y                        | n                    |
| 15003078 | Oberlander, T. F. | 2004             | Longitudinal                            | paroxetine                                                                             | 33                 | n                         | y                             | y                                         | n                      | n                            | n               | n                               | n                        | n                    |
| 15035694 | Rampono, J.       | 2004             | At delivery only                        | sertraline, fluoxetine, paroxetine, venlafaxine                                        | 11                 | n                         | y                             | y                                         | n                      | n                            | n               | n                               | y                        | n                    |
| 16271264 | Loughhead, A. M.  | 2006             | At delivery only                        | clomipramine, nortriptyline                                                            | 17                 | n                         | y                             | y                                         | n                      | n                            | n               | y                               | y                        | n                    |
| 16390902 | Loughhead, A. M.  | 2006             | Longitudinal                            | sertraline, fluoxetine, paroxetine, citalopram, escitalopram, venlafaxine              | 24                 | n                         | y                             | n                                         | n                      | y                            | n               | n                               | y                        | n                    |
| 16433870 | Kim, J.           | 2006             | Longitudinal                            | fluoxetine                                                                             | 9                  | n                         | y                             | y                                         | n                      | n                            | n               | n                               | y                        | n                    |
| 18004149 | Klier, C. M.      | 2007             | Longitudinal                            | venlafaxine, trazodone                                                                 | 2                  | n                         | y                             | n                                         | y                      | n                            | y               | y                               | n                        | n                    |
| 18426260 | Sit, D. K.        | 2008             | Longitudinal                            | sertraline, citalopram, escitalopram                                                   | 11                 | n                         | y                             | n                                         | n                      | n                            | y               | n                               | y                        | n                    |
| 19011433 | Freeman, M. P.    | 2008             | Longitudinal, multiple samples pk study | sertraline                                                                             | 6                  | n                         | y                             | n                                         | y                      | n                            | y               | y                               | y                        | n                    |
| 19452377 | Rampono, J.       | 2009             | At delivery only                        | sertraline, fluoxetine, paroxetine, citalopram, escitalopram, fluvoxamine, venlafaxine | 38                 | n                         | y                             | y                                         | n                      | n                            | n               | n                               | y                        | n                    |
| 19743889 | Ververs, F. F.    | 2009             | Longitudinal                            | paroxetine                                                                             | 74                 | n                         | y                             | n                                         | n                      | n                            | y               | n                               | n                        | y                    |
| 19809008 | Briggs, G. G.     | 2009             | Two time points postpartum              | duloxetine                                                                             | 1                  | n                         | y                             | y                                         | n                      | n                            | y               | y                               | n                        | n                    |
| 20060670 | O'Brien, L.       | 2010             | Longitudinal                            | sertraline, fluoxetine, citalopram, venlafaxine                                        | 9                  | n                         | hair sample                   | n                                         | n                      | n                            | n               | n                               | y                        | n                    |
| 20631556 | Sit, D.           | 2010             | Longitudinal                            | fluoxetine                                                                             | 17                 | n                         | y                             | n                                         | n                      | n                            | y               | n                               | y                        | n                    |
| 21359876 | Boyce, P. M.      | 2011             | At delivery and postpartum              | duloxetine                                                                             | 1                  | n                         | y                             | y                                         | n                      | n                            | y               | reported one of the two samples | n                        | n                    |
| 21824458 | Sit, D.           | 2011             | At delivery only                        | sertraline, fluoxetine, citalopram, escitalopram, fluvoxamine, venlafaxine             | 21                 | n                         | y                             | y                                         | n                      | n                            | y               | n                               | y                        | n                    |
| 24668283 | Osborne, L. M.    | 2014             | Longitudinal                            | nortriptyline                                                                          | 1                  | n                         | y                             | n                                         | n                      | n                            | y               | n                               | n                        | y                    |
| 24989434 | ter Horst, P. G.  | 2014             | Longitudinal                            | venlafaxine                                                                            | 7                  | n                         | y                             | n                                         | n                      | n                            | y               | n                               | y                        | n                    |
| 26416100 | Ter Horst, P. G.  | 2015             | Longitudinal                            | clomipramine                                                                           | 12                 | n                         | y                             | n                                         | n                      | n                            | y               | n                               | y                        | y                    |
| 27180885 | Fokina, V. M.     | 2016             | At delivery only                        | bupropion                                                                              | 22                 | n                         | y                             | y                                         | n                      | y                            | n               | y                               | y                        | n                    |
| 27528039 | Fokina, V. M.     | 2016             | Longitudinal, multiple samples pk study | bupropion                                                                              | 28                 | n                         | y                             | n                                         | y                      | n                            | n               | y                               | y                        | y                    |
| 28129551 | Paulzen, M.       | 2017             | At delivery only                        | sertraline                                                                             | 6                  | n                         | y                             | y                                         | n                      | y                            | n               | n                               | n                        | n                    |
| 28663113 | Paulzen, M.       | 2017             | At delivery only                        | citalopram                                                                             | 12                 | n                         | y                             | y                                         | n                      | y                            | n               | n                               | n                        | n                    |
| 28708853 | Westin, A. A.     | 2017             | Longitudinal                            | sertraline, fluoxetine, paroxetine, citalopram, escitalopram, fluvoxamine, venlafaxine | 281                | self-control              | y                             | n                                         | n                      | n                            | y               | Mean                            | y                        | n                    |
| 30346625 | Carvalho, D. M.   | 2019             | Longitudinal, multiple samples pk study | fluoxetine                                                                             | 9                  | n                         | y                             | y                                         | y                      | y                            | y               | y                               | y                        | n                    |
| 32056930 | Paulzen M         | 2020             | At delivery only                        | venlafaxine                                                                            | 9                  | n                         | y                             | y                                         | n                      | y                            | n               | y                               | y                        | n                    |
| 33253437 | Colombo A         | 2020             | Longitudinal                            | sertraline, fluoxetine, paroxetine, citalopram, escitalopram, venlafaxine              | 55                 | n                         | y                             | y                                         | n                      | n                            | y               | Range                           | n                        | y                    |
| 33751155 | Heinonen E        | 2021             | Longitudinal                            | sertraline                                                                             | 9                  | n                         | y                             | y                                         | n                      | n                            | y               | n                               | n                        | n                    |
| 33814540 | Fay EE            | 2021             | Longitudinal                            | bupropion                                                                              | 8                  | n                         | y                             | y                                         | y                      | n                            | y               | y                               | y                        | y                    |

| PMID     | First Author | Publication Year | Study Design                            | Drug                                                                                                    | Number of Patients | Nonpregnant Control Group | Maternal Plasma Concentration | Cord Blood or Infant Plasma Concentration | Reported PK parameters | Amniotic Fluid Concentration | Dose Normalized | Reported Time after Dose | Metabolite Concentration | Genotype Information |
|----------|--------------|------------------|-----------------------------------------|---------------------------------------------------------------------------------------------------------|--------------------|---------------------------|-------------------------------|-------------------------------------------|------------------------|------------------------------|-----------------|--------------------------|--------------------------|----------------------|
| 34348038 | Saito J      | 2021             | At delivery only                        | trazodone                                                                                               | 1                  | n                         | y                             | y                                         | n                      | n                            | y               | y                        | y                        | n                    |
| 34483982 | Campbell KSJ | 2021             | Longitudinal, multiple samples pk study | sertraline, fluoxetine, paroxetine, citalopram, venlafaxine                                             | 23                 | n                         | y                             | n                                         | y                      | n                            | y               | y                        | n                        | n                    |
| 36094046 | Stika CS     | 2022             | Longitudinal                            | sertraline                                                                                              | 47                 | 2 postpartum              | y                             | n                                         | n                      | n                            | y               | Range                    | y                        | y                    |
| 36103361 | Leutritz AL  | 2022             | Longitudinal                            | sertraline, citalopram, escitalopram, venlafaxine, duloxetine, clomipramine, amitriptyline, mirtazapine | 63                 | n                         | y                             | n                                         | n                      | n                            | y               | Range                    | n                        | n                    |
