# Supplementary material
Source: PubMed Central journal article supplement (PMC10442696)
Supplement: NIHMS1901964-supplement-Table_S3.pdf [file NIHMS1901964-supplement-Table_S3.pdf]

Supplemental Table 3. Trends in maternal exposure observed in longitudinal studies

| Drug          | PMID     | number of subjects | number of time points throughout pregnancy | Trend through out pregnancy                             | Trend compared to delivery | Trend compared to postpartum or non-pregnant                    | Comments                                                                              |
|---------------|----------|--------------------|--------------------------------------------|---------------------------------------------------------|----------------------------|-----------------------------------------------------------------|---------------------------------------------------------------------------------------|
| Sertraline    | 11082480 | 1                  | 1                                          | -                                                       | higher                     | -                                                               |                                                                                       |
|               | 18426260 | 6                  | 3                                          | no trend                                                | higher                     | higher                                                          |                                                                                       |
|               | 19011433 | 6                  | 2                                          | decrease#                                               | -                          | lower#                                                          |                                                                                       |
|               | 28708853 | 34                 | 3                                          | increase*                                               | -                          | higher*                                                         |                                                                                       |
|               | 33253437 | 24                 | 1                                          | -                                                       | higher                     | -                                                               |                                                                                       |
|               | 33751155 | 9                  | 2                                          | increase                                                | no trend                   | lower                                                           |                                                                                       |
|               | 36094046 | 47                 | 9                                          | no trend                                                | -                          | lower*                                                          |                                                                                       |
| 36103361      | 11       | 3                  | no trend                                   | -                                                       | lower                      |                                                                 |                                                                                       |
| Fluoxetine    | 12709723 | 11                 | 1                                          | -                                                       | -                          | lower*                                                          |                                                                                       |
|               | 16433870 | 9                  | 1                                          | -                                                       | higher†                    | -                                                               |                                                                                       |
|               | 20631556 | 17                 | 3                                          | decrease# for Racemic and S-FLX;<br>decrease* for R-FLX | higher#                    | lower*                                                          |                                                                                       |
|               | 28708853 | 41                 | 3                                          | decrease#                                               | -                          | lower#                                                          |                                                                                       |
| Paroxetine    | 15003078 | 33                 | 1                                          | -                                                       | higher†                    | -                                                               |                                                                                       |
|               | 19743889 | 74                 | 3                                          | decrease* in CYP2D6 EM;<br>increase* in IM/PM           | -                          | -                                                               |                                                                                       |
|               | 28708853 | 19                 | 3                                          | decrease*                                               | -                          | lower*                                                          |                                                                                       |
| Citalopram    | 12189365 | 11                 | 3                                          | no trend                                                | lower                      | lower                                                           |                                                                                       |
|               | 18426260 | 3                  | 3                                          | decrease                                                | higher                     | lower at 2 weeks postpartum,<br>no trend at 12 weeks postpartum |                                                                                       |
|               | 28708853 | 58                 | 3                                          | decrease*                                               | -                          | lower*                                                          |                                                                                       |
|               | 36103361 | 4                  | 3                                          | increase                                                | -                          | lower                                                           |                                                                                       |
| Escitalopram  | 18426260 | 2                  | 3                                          | no trend                                                | no trend                   | lower at 2w pp,<br>no trend at 12w pp                           |                                                                                       |
|               | 28708853 | 95                 | 3                                          | increase#                                               | -                          | higher#                                                         |                                                                                       |
|               | 33253437 | 7                  | 1                                          | -                                                       | higher                     | -                                                               |                                                                                       |
|               | 36103361 | 8                  | 3                                          | decrease                                                | -                          | lower                                                           |                                                                                       |
| Fluvoxamine   | 11082480 | 1                  | 1                                          | -                                                       | higher                     | -                                                               |                                                                                       |
|               | 28708853 | 3                  | 3                                          | decrease*                                               | -                          | lower*                                                          |                                                                                       |
| Venlafaxine   | 18004149 | 1                  | 3                                          | increase                                                | -                          | lower                                                           | elimination half life decreased during pregnancy and normalized at 6months postpartum |
|               | 24989434 | 7                  | 3                                          | decrease*                                               | -                          | lower                                                           |                                                                                       |
|               | 28708853 | 33                 | 3                                          | decrease#                                               | -                          | lower#                                                          |                                                                                       |
|               | 33253437 | 7                  | 1                                          | -                                                       | higher                     | -                                                               |                                                                                       |
|               | 36103361 | 8                  | 2                                          | decrease                                                | -                          | lower                                                           |                                                                                       |
| Duloxetine    | 36103361 | 1                  | 2                                          | decrease                                                | -                          | -                                                               |                                                                                       |
| Trazodone     | 18004149 | 1                  | 3                                          | no trend                                                | -                          | -                                                               | elimination half life increased slightly during pregnancy                             |
| Clomipramine  | 8379562  | 1                  | 1                                          | -                                                       | -                          | lower                                                           | C/D ratio of clomipramine plus desclomipramine                                        |
|               | 26416100 | 12                 | 3                                          | decrease#                                               | -                          | no trend                                                        |                                                                                       |
|               | 36103361 | 4                  | 2                                          | decrease                                                | -                          | no trend                                                        |                                                                                       |
| Nortriptyline | 8379562  | 6                  | 1                                          | -                                                       | -                          | lower                                                           | 1.58-fold higher doses were required during pregnancy                                 |
|               | 8834425  | 1                  | 3                                          | no trend                                                | -                          | lower                                                           |                                                                                       |
|               | 24668283 | 1                  | 3                                          | no trend                                                | -                          | lower                                                           |                                                                                       |
| Imipramine    | 8379562  | 1                  | 1                                          | -                                                       | -                          | lower                                                           |                                                                                       |
|               | 8834425  | 1                  | 3                                          | no trend                                                | -                          | lower                                                           |                                                                                       |
| Amitriptyline | 36103361 | 16                 | 3                                          | decrease                                                | -                          | lower                                                           |                                                                                       |
| Mirtazapine   | 36103361 | 11                 | 3                                          | no trend                                                | -                          | lower                                                           |                                                                                       |
| Bupropion     | 27528039 | 28                 | 2                                          | decrease#†                                              | -                          | lower#†                                                         | Clearance decreased during pregnancy but was higher at postpartum                     |
|               | 33814540 | 8                  | 2                                          | no trend                                                | -                          | no trend                                                        |                                                                                       |

\*significantly different  
#not significant  
†dose not normalized
